# Supplementary material
Source: Springer Nature journal article supplement (https://www.springermedizin.de/resource/supplementary/12884_2012_564_MOESM5_ESM.pdf/9458064)

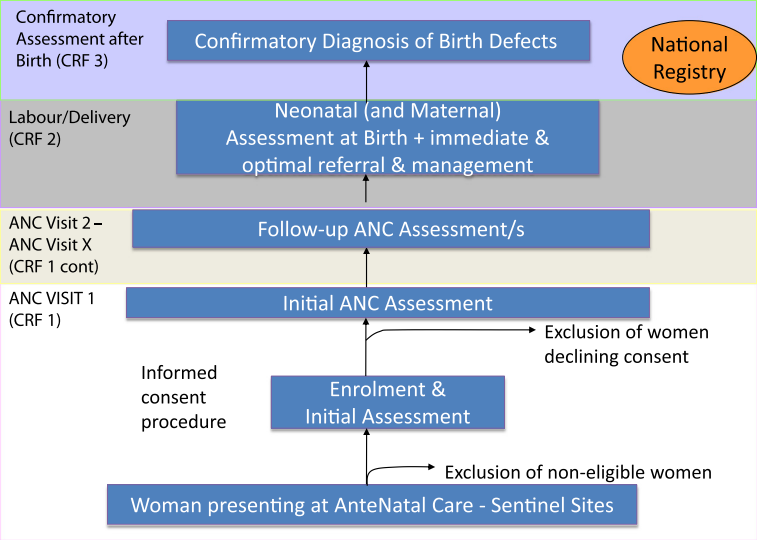

Supplement: MOESM5 [file 9458064]
